# Supplementary material
Source: PubMed Central journal article supplement (PMC2049081)
Supplement: bj4080029add.pdf [file bj4080029add.pdf]

## Supplementary Material

Table S1. Structure alignment statistics for trichosurin and 26 representative structures from the retinol binding-like protein family from SCOP (50815). These alignment statistics along with the dendogram and structure-based sequence alignment were generated using the program MAMMOTH [25].

| PDB code | Description            | Naln | RMS  | P-value | Sequence ID | Z-score |
|----------|------------------------|------|------|---------|-------------|---------|
| 1kt7     | Bovine RBP             | 119  | 3.43 | 0.1E-06 | 11.35       | 16.82   |
| 1aqb     | Pig RBP                | 121  | 3.39 | 0.7E-07 | 13.48       | 17.16   |
| 1rbp     | Human RBP              | 122  | 3.83 | 0.6E-07 | 12.77       | 17.33   |
| 1rlb     | Chicken RBP            | 124  | 3.51 | 0.4E-07 | 11.35       | 17.67   |
| 1iiu     | Chicken RBP            | 125  | 3.64 | 0.4E-07 | 12.06       | 17.84   |
| 1hn2     | Bovine OBP             | 106  | 2.23 | 0.8E-06 | 20.57       | 14.60   |
| 1dzk     | Pig OBP                | 139  | 2.29 | 0.4E-08 | 24.11       | 20.23   |
| 1bj7     | Bovine d2              | 139  | 2.10 | 0.4E-08 | 21.99       | 20.23   |
| 1ew3     | Equine c2              | 141  | 1.55 | 0.3E-08 | 28.37       | 20.57   |
| 1gm6     | Boar SLP               | 140  | 1.51 | 0.3E-08 | 24.82       | 20.40   |
| 1e5p     | Hamster aphrodisin     | 139  | 2.11 | 0.4E-08 | 20.57       | 20.23   |
| 1beb     | Bovine BLG             | 139  | 2.76 | 0.4E-08 | 20.57       | 20.23   |
| 1exs     | Pig BLG                | 134  | 3.40 | 0.9E-08 | 19.15       | 19.38   |
| 1epb     | Rat RBP                | 137  | 2.71 | 0.5E-08 | 15.60       | 19.89   |
| 1jv4     | Mouse rMUP             | 141  | 1.64 | 0.3E-08 | 34.04       | 20.57   |
| 1mup     | Mouse MUP              | 141  | 1.70 | 0.3E-08 | 34.04       | 20.57   |
| 2a2u     | Rat MUP                | 141  | 1.33 | 0.3E-08 | 34.04       | 20.57   |
| 1l6m     | Human NGAL             | 127  | 2.85 | 0.3E-07 | 17.02       | 18.18   |
| 1jzu     | Quail q83              | 123  | 3.63 | 0.5E-07 | 10.64       | 17.50   |
| 1lf7     | Human C8 $\gamma$      | 124  | 3.13 | 0.4E-07 | 11.35       | 17.67   |
| 1bbp     | Butterfly billin BP    | 107  | 3.77 | 0.6E-06 | 10.64       | 14.77   |
| 1i4u     | $\alpha$ -crustacyanin | 113  | 3.35 | 0.2E-06 | 11.35       | 15.80   |
| 1qft     | Tick histamine BP      | 94   | 3.67 | 0.5E-05 | 6.38        | 12.55   |
| 1np1     | Nitrophorin I          | 118  | 3.80 | 0.1E-06 | 6.38        | 16.65   |
| 1euo     | Nitrophorin II         | 120  | 3.86 | 0.8E-07 | 4.26        | 16.99   |
| 1d2u     | Nitrophorin IV         | 121  | 3.83 | 0.7E-07 | 7.09        | 17.16   |

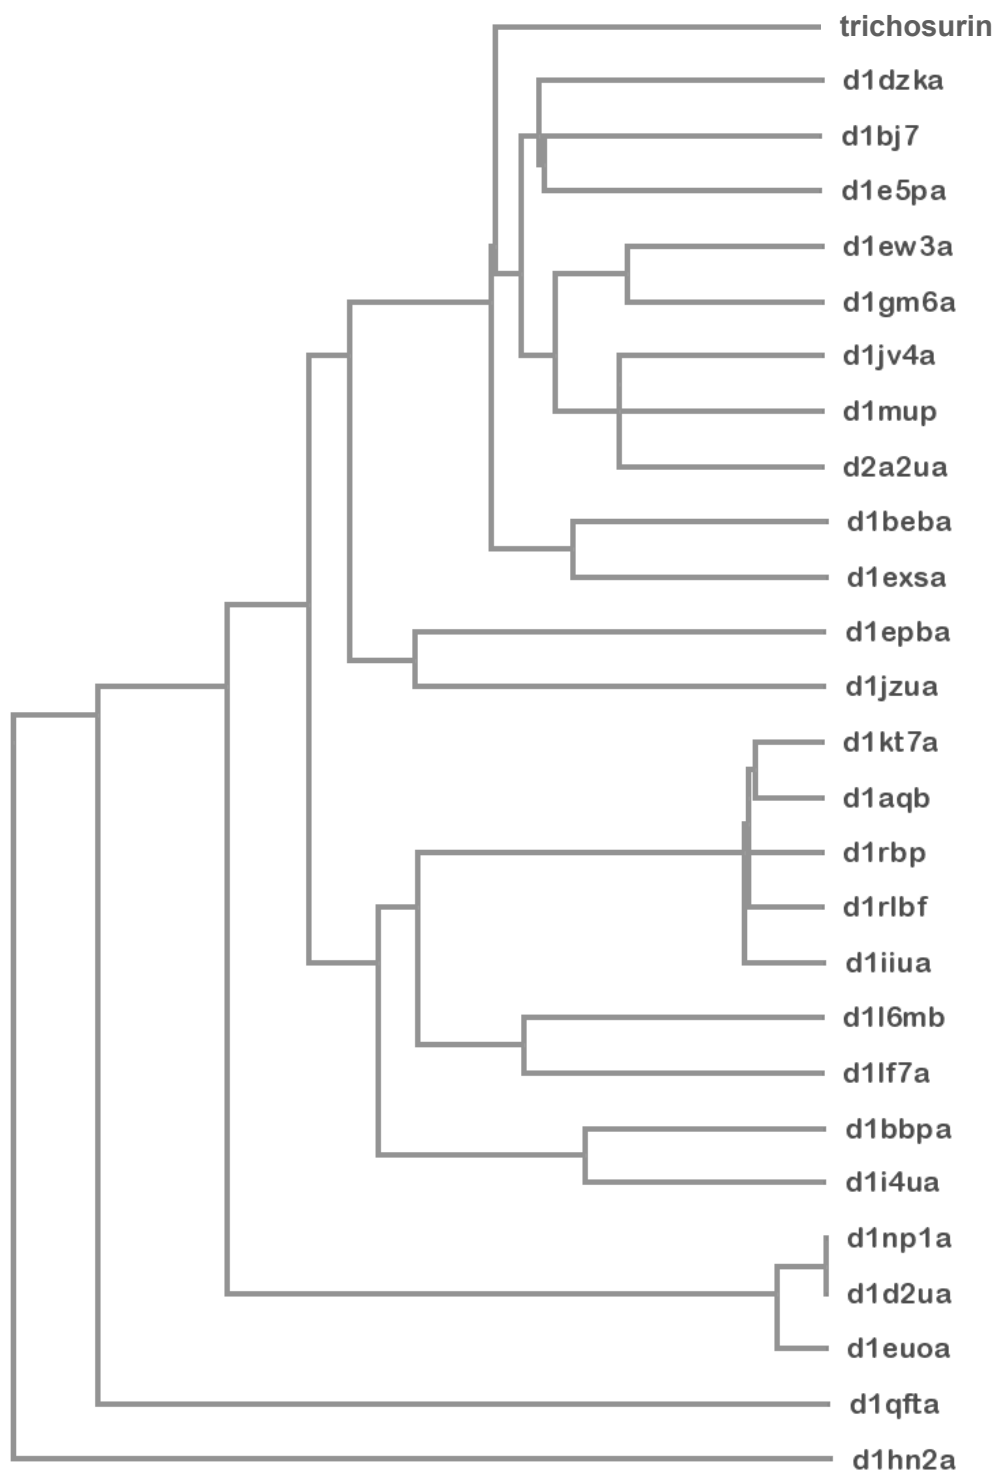

Figure S1. Dendrogram showing the relationships between trichorsurin and 26 representative structures from the SCOP retinol binding-like protein family (50815). PDB codes are given at each leaf (these have the prefix ‘d’ and the suffix denoting the chain used in the superposition). The tree was calculated by MAMMOTH incorporating both structure alignment and sequence identity (see table S1) [25].

Figure S2. Sequence alignment derived from the superposition of trichosurin and 26 representative structures from the SCOP retinol binding-like protein family (50815).

```

trichosurin      ..... .L...RHWHT VVLASSDRSL
d1kt7a_.ent     .....ERDC RVSSFRVKE. ..NF..DKAR FA...GTWYA MAKKDPEG..
dlaqb_.ent      .....ERDC RVSSFRVKE. ..NF..DKAR FS...GTWYA MAKKDPEG..
dlrbp_.ent      .....ERDC RVSSFRVKE. ..NF..DKAR FS...GTWYA MAKKDPEG..
dlrlbf_.ent     .....ERDC RVSSFRVKE. ..NF..DKAR FA...GTWYA MAKKDPEG..
dliiua_.ent     .....MDC  RVSSFKVKE. ..NF..DKNR YS...GTWYA MAKKDPEG..
dlhn2a_.ent     .....      .....AQ EEEAEQNLSE LS...GPWRT VYIGSTNPEK
dldzka_.ent     .....      .....      .....FE LS...GKWIT SYIGSSDLEK
d1bj7_.ent      .....      .....      .....I..DPSK IP...GEWRI IYAAAADNKDK
dlew3a_.ent     .....      .....VA IRNF..DISK IS...GEWYS IFLASDVKEK
d1gm6a_.ent     .....      .....VV TSNF..DASK IA...GEWYS ILLASADKEN
dle5pa_.ent     .....      .....      .....FAE LQ...GKWYT IVIAADNLEK
dlbeba_.ent     .....      .....QT MKGL..DIQK VA...GTWYS LAMAASDISL
dlexsa_.ent     .....      .....VEVTPI MTEL..DTQK VA...GTWHT VAMAVSDVSL
dlepbba_.ent    .....      .....      .....VKDF..DISK FL...GFWYE IAFASKMGTP
dljv4a_.ent     .....      .....EEASST GRNF..NVEK IN...GEWHT IILASDKREK
dlmup_.ent      .....      .....EEASST GRNF..NVEK IN...GEWHT IILASDKREK
d2a2ua_.ent     .....      .....EEASST RGNL..DVAK LN...GDWFS IVVASNKREK
d1l6mb_.ent     ..TSDLIPAP PLSKVPLQQ. ..NF..QDNQ FQ...GKWYV VGLAGNAI..
dljzua_.ent     .....      .....      .....MTVP..DRSE IA...GKWYV VALASNTIEFF
d1lf7a_.ent     .....      .....AS PISTIQPKA. ..NF..DAQQ FA...GTWLL VAVGSAG...
dlbbpa_.ent     ....NVYHDG ACPEVKPVD. ..NF..DWSN YH...GKWWE VAKYPNSV..
dli4ua_.ent     DKIPDFVVPK KCASVDRNKL WAEQTPNRNS YA...GVWYQ FALTNNPY..
dlqfta_.ent     .....      .....N QPDWADEAAN GAHQDAWKSL KADVENVYYM VKATY...KN
dlnpla_.ent     .....      .....K CTKNALAQ.  ..GFNKDKYF NG...DVWYV TDYLDLEPDD
dleuoa_.ent     .....      .....MD CSTNISPKQ.  ..GLDKAKYF S...GKWYV THFLDKDPQ.
d1d2ua_.ent     .....      .....A CTKNAIAQ.  ..GFNKDKYF NG...DVWYV TDYLDLEPDD

trichosurin      IE.EEGPFRN FIQNIT.VE. .SGNLNGFFL T..RK...NG QCIPLYLTA
d1kt7a_.ent     ...LFLQDN. IVAEFS.VDE .NGHMSATAK GRVRLLNND VCADMVGTFT
dlaqb_.ent      ...LFLQDN. IVAEFS.VDE .NGHMSATAK GRVRLLNND VCADMVGTFT
dlrbp_.ent      ...LFLQDN. IVAEFS.VDE .TGQMSATAK GRVRLLNND VCADMVGTFT
dlrlbf_.ent     ...LFLQDN. IVAEFS.VDE .NGHMSATAK GRVRLLNND VCADMVGTFT
dliiua_.ent     ...LFLQDN. VVAQFT.VDE .NGQMSATAK GRVRLFNND VCADMIGSFT
dlhn2a_.ent     IQ.ENGPFRN YFREL.V. FDD EKGTVDFYFS V..KR...DG KWKNVHVKAT
dldzka_.ent     IG.ENAPFQV FMRSIE.FDD KESKVYLNFF S..KE...NG ICEEFSLIGT
d1bj7_.ent      IV.EGGPLRN YYRIE.CIN DCESLSITFY L..KD...QG TCLLLTEVAK
dlew3a_.ent     IE.ENGSMRV FVDVIR.ALD .NSSLYAEYQ T..KV...NG ECTEFPVDFD
d1gm6a_.ent     IE.ENGSMRV FVEHIR.VLD .NSSLAFKFQ R..KV...NG ECTDFYAVCD
dle5pa_.ent     IE.EGGPLRF YFRHID.CYK NCSEXEITFY V..IT...NN QCSKTFVIGY
dlbeba_.ent     LDAQSAPLRV YVEELK.PTP .EGDLEILLQ K..WE...NG ECAQKIIAE
dlexsa_.ent     LDAKSSPLKA YVEGLK.PTP .EGDLEILLQ K..RE...ND KCAQEVLLAK
dlepbba_.ent    GLAHKEEKM. GAMVVE.LKE .NLLALTTT Y..YS...ED HCVLEKVTAT
dljv4a_.ent     IE.DNGNFRL FLEQIH.VL. .EKSLVLKFH T..VR...DE ECSELSMVAD
dlmup_.ent      IE.DNGNFRL FLEQIH.VL. .ENSLVLKFH T..VR...DE ECSELSMVAD
d2a2ua_.ent     IE.ENGSMRV FMQHID.VL. .ENSLGFKFR I..KE...NG ECRELYLVAY
d1l6mb_.ent     ...LRPQKM. YATIYE.LKE .DKSYNVTSV LFR....KK KCDYWIRTFV
dljzua_.ent     LREKDKMKM. AMARIS.FLG .EDELKVSYA VPKPN...GC RKWETTFKKT
d1lf7a_.ent     ...RRAEA. TTLHVA.PQ. .GTAMAVSTF RKL...DG ICWQVRQLYG
dlbbpa_.ent     ...EKYGKC. GWA EYT.PE. .GKSVKVSNY HV..I...HG KEYFIEGTAY
dli4ua_.ent     ...QLIEKC. VRNEYS.FD. .GKQFVIEST GIAY...DG NLLKRNGKLY
dlqfta_.ent     DPVWGNDFTC VGVMANDVNE DEKSIQAEFL FMMNA...DT NMQFATEKVT
dlnpla_.ent     VPKR....YC AALAAG.TAS .GKLKEALYH YDP....KT QDTFYDVSEL
dleuoa_.ent     VTDQ....YC SSFTPR.ESD .GTVKEALYH YNA....NK KTSFYNIGEG
d1d2ua_.ent     VPKR....YC AALAAG.TAS .GKLKEALYH YDP....KT QDTFYDVSEL

```

|              |             |            |            |            |             |
|--------------|-------------|------------|------------|------------|-------------|
| trichosurin  | KTEE.....A  | RQFKL.N... | .....      | .YYGTNDVYY | ESSKPNEYAK  |
| d1kt7a_.ent  | DTED.....P  | AKFKMKYWGV | ASF.....   | LQKGNDDHWI | IDTDYETFAV  |
| dlaqb_.ent   | DTED.....P  | AKFKMKYWGV | ASF.....   | LQKGNDDHWI | IDTDYDITYAV |
| d1rbp_.ent   | DTED.....P  | AKFKMKYWGV | ASF.....   | LQKGNDDHWI | VDTDYDITYAV |
| d1rlbf_.ent  | DTED.....P  | AKFKMKYWGV | ASF.....   | LQKGNDDHWI | IDTDYETFAV  |
| dliiua_.ent  | DTED.....P  | AKFKMKYWGV | ASF.....   | LQKGNDDHWV | VDTDYDITYAL |
| d1hn2a_.ent  | KQDD.....   | GTYVAD.... | .....      | .YEGQNVFKI | VSL.SRTHLV  |
| d1dzka_.ent  | KQ.E.....G  | NTYDV.N... | .....      | .YAGNNKFVV | SYA.SETALI  |
| d1bj7_.ent   | RQ.E.....G  | YVYVL.E... | .....      | .FYGTNTLEV | IHV.SENMLV  |
| dlew3a_.ent  | KTEE.....D  | GVYSL.N... | .....      | .YDGYNVFRI | SEFENDEHII  |
| d1gm6a_.ent  | KV.G.....D  | GVYTV.A... | .....      | .YYGENKFRL | LEVNYSDYVI  |
| d1e5pa_.ent  | LK.G.....N  | GTYET.Q... | .....      | .FEGNNIFQP | LYI.TSDKIF  |
| d1beba_.ent  | KTKI.....P  | AVFKI.D... | .....      | .ALNENKVLV | LDTDYKKYLL  |
| d1exsa_.ent  | KTDI.....P  | AVFKI.N... | .....      | .ALDENQLFL | LDTDYDSHLL  |
| d1lepba_.ent | EGDG.....P  | AKFQVTR... | .....      | .LSGKKEVVV | EATDYLYTAI  |
| d1jv4a_.ent  | KTEK.....A  | GEYSV.T... | .....      | .YDGFNTFTI | PKTDYDNFLM  |
| d1mup_.ent   | KTEK.....A  | GEYSV.T... | .....      | .YDGFNTFTI | PKTDYDNFLM  |
| d2a2ua_.ent  | KTPE.....D  | GEYFV.E... | .....      | .YDGGNTFTI | LKTDYDRYVM  |
| d1l6mb_.ent  | PGSQ.....P  | GEFTLGNIKS | Y.....     | PGLTSYLVRV | VSTNYNQHAM  |
| d1jzua_.ent  | SDDG.....E  | VYYSEE.... | .....      | ...AKKKVEV | LDTDYKSYAV  |
| d1lf7a_.ent  | DTGV.....L  | GRFLLQ...A | R.....     | GARGAVHVVV | AETDYQSFVAV |
| d1bbpa_.ent  | PVGDS...KI  | GKIYHKLTYG | .....      | GVTKENVFNV | LSTDNKNYII  |
| d1i4ua_.ent  | PN.PF...GE  | PHLSIDYEN. | .....      | ..SFAAPLVI | LETDYSNYAC  |
| d1qfta_.ent  | AVKMYGYNRE  | NAFRYETE.. | .....      | .DGQVFTDVI | AYSD.DNCDV  |
| d1npla_.ent  | QEE.....SP  | GKYTANFKKV | EKNGNVKVDV | TSGNYTFTV  | MYAD.DSSAL  |
| d1euoa_.ent  | KLES.....SG | LQYTAKYKTV | DKKKAVLKEA | DEKNSYTLTV | LEAD.DSSAL  |
| d1d2ua_.ent  | QVE.....SL  | GKYTANFKKV | DKNGNVKVAV | TAGNYTFTV  | MYAD.DSSAL  |

|              |             |            |             |            |             |
|--------------|-------------|------------|-------------|------------|-------------|
| trichosurin  | FIFYNYH.D.  | .GKVNVANL  | FG RTP.NLSN | EIKKRFEEDF | .MNRGFRREN  |
| d1kt7a_.ent  | QYSCRLNLND  | GTCADSYSFV | FARDPSGFSP  | EVQKIVRQRQ | .EELCLAR.Q  |
| dlaqb_.ent   | QYSCRLQNLND | GTCADSYSFV | FARDPHGFSP  | EVQKIVRQRQ | .EELCLAR.Q  |
| d1rbp_.ent   | QYSCRLNLND  | GTCADSYSFV | FSRDPNGLPP  | EAQKIVRQRQ | .EELCLAR.Q  |
| d1rlbf_.ent  | QYSCRLNLND  | GTCADSYSFV | FARDPSGFSP  | QVQKIVRQRQ | .EELCLAR.Q  |
| dliiua_.ent  | HYSORELND   | GTCADSYSFV | FSRDPKGLPP  | EAQKIVRQRQ | .IDLCLDR.K  |
| d1hn2a_.ent  | AHNINVDKH.  | .GQTELTEL  | FVKL..NVED  | EDLEKFWKLT | .EDKIDKKN   |
| d1dzka_.ent  | ISNINVDEE.  | .GDKTIMTGL | LGKGT.DIED  | QDLEKFKVEV | .RENGIPEEN  |
| d1bj7_.ent   | TYVENYD.G.  | .ERITKMTEG | LAKGT.SFTP  | EELEKYQQLN | .SERGVPNEN  |
| dlew3a_.ent  | LYLVNFD.K.  | .DRPFQLFEF | YAREP.DVSP  | EIKEEFVKIV | .QKRGIVKEN  |
| d1gm6a_.ent  | LHLVDVN.G.  | .DKTFQLMEF | YGRKP.DVEP  | KLKDKFVEIC | .QYGLIKEN   |
| d1e5pa_.ent  | FTNKNXDRA.  | .GQETNXIVV | AGKGN.ALTP  | EENEILVQFA | .HEKKIPVEN  |
| d1beba_.ent  | FCMENSAEP.  | .E.QSLVCQC | LVRTP.EVDD  | EALEKFDKAL | .KA..LPMHI  |
| d1exsa_.ent  | LCMENSASP.  | .E.HSLVCQS | LARTL.EVDD  | QIREKFEDAL | .KTLSVPMRI  |
| d1lepba_.ent | IDITSLV.A.  | .GAVHRTMKL | YSRSL.DDNG  | EALYNFRKIT | .SDHGFS'ETD |
| d1jv4a_.ent  | AHLINEK.D.  | .GETFQLMGL | YGREP.DLSS  | DIKERFAQLC | .EEHGILREN  |
| d1mup_.ent   | AHLINEK.D.  | .GETFQLMGL | YGREP.DLSS  | DIKERFAQLC | .EEHGILREN  |
| d2a2ua_.ent  | FHLINFK.N.  | .GETFQLMVL | YGRTK.DLSS  | DIKEKFAKLC | .EAHGITRDN  |
| d1l6mb_.ent  | VFFKKVSQ..  | .NREYFKITL | YGRTK.ELTE  | .LKENFIRFS | .KSLGLPENH  |
| d1jzua_.ent  | IYATRVK.D.  | .GRTLHMMRL | YSRSP.EVSP  | AATAIFRCLA | .GERNYTDEM  |
| d1lf7a_.ent  | LYLERA....  | ...QLSVKL  | YARSL.PVSD  | SVLSGFQQRV | .QEAHLEDQ   |
| d1bbpa_.ent  | GYYC.KYDED  | KKGHQDFVWV | LSRSK.VLTG  | EAKTAVENYL | IGSPVVD SQK |
| d1i4ua_.ent  | LYSC.IDYN.  | FGYHSDFSFI | FSRSA.NLAD  | QYVKKCEAAF | .KNINVDTTR  |
| d1qfta_.ent  | IYVPGTD...  | ..GNEEGYEL | WTTDYDNIPA  | NCLNKFNEYA | V.....GRE   |
| d1npla_.ent  | IHTCLHKGN.  | .KDLGDLYAV | LNRNKDTNAG  | D...KVKGAV | T.AASLKFS'D |
| d1euoa_.ent  | VHICLREGS.  | .KDLGDLYTV | LTHQKDAEPS  | A...KVKSAV | T.QAGLQLSQ  |
| d1d2ua_.ent  | IHTCLHKGN.  | .KDLGDLYAV | LNRNKDAAAG  | D...KVKSAV | S.AATLEFSK  |

|              |            |            |       |
|--------------|------------|------------|-------|
| trichosurin  | ILDISEVDHC | .....      | ..... |
| d1kt7a_.ent  | YRLIPH...N | GYCD.....  | ..... |
| d1aqb_.ent   | YRIITH...N | GYCD.....  | ..... |
| d1rbp_.ent   | YRLIVH...N | GYC.....   | ..... |
| d1rlbf_.ent  | YRLIPH...N | GYC.....   | ..... |
| d1iiua_.ent  | YRVIVH...N | GFCS.....  | ..... |
| d1hn2a_.ent  | VVNFLNENH  | PHPE.....  | ..... |
| d1dzka_.ent  | IVNIIERDDC | PA.....    | ..... |
| d1bj7_.ent   | IENLIKTDNC | PP.....    | ..... |
| d1ew3a_.ent  | IIDLTKIDRC | FQLRG..... | ..... |
| d1gm6a_.ent  | IIDLTKIDRC | FQLRG..... | ..... |
| d1e5pa_.ent  | ILNILATDTC | PE.....    | ..... |
| d1beba_.ent  | RLSFNPTQLE | EQC.....   | ..... |
| d1exsa_.ent  | LPAQL..EEQ | CRV.....   | ..... |
| d1epba_.ent  | LYILKHDLTC | VKVLQSAA.. | ..... |
| d1jv4a_.ent  | IIDLSNANRC | .....      | ..... |
| d1mup_.ent   | IIDLSNANRC | .....      | ..... |
| d2a2ua_.ent  | IIDLTKTDRC | L.....     | ..... |
| d1l6mb_.ent  | IVFPVP...I | DQCID..... | ..... |
| d1jzua_.ent  | VAMLPRQEEC | TVDEV..... | ..... |
| d1lf7a_.ent  | IFYFPK...Y | GFCEAADQFH | VLDEV |
| d1bbpa_.ent  | LVYSDFSEAA | CKVN.....  | ..... |
| d1i4ua_.ent  | FVKTVQGSSC | PYDTQKTL.. | ..... |
| d1qfta_.ent  | TRDVFTSACL | EIAAA..... | ..... |
| d1npl1a_.ent | FISTKDNKC. | .EYDNVSLKS | LLTK. |
| d1euoa_.ent  | FVGTKDLGC. | .QYDDQFTSL | ..... |
| d1d2ua_.ent  | FISTKENNC. | .AYDNDSLKS | LLTK. |
